# Supplementary material for: Diversity of plant defense elicitor peptides within the Rosaceae
Source: PubMed Central journal article supplement (PMC5782389; doi:10.1186/s12863-017-0593-4), 2018-01-23

### Additional file 3

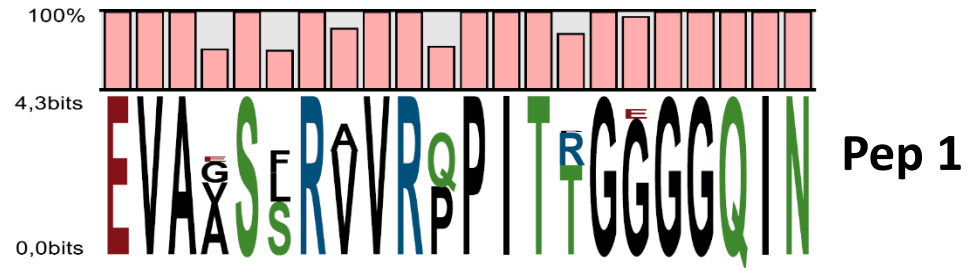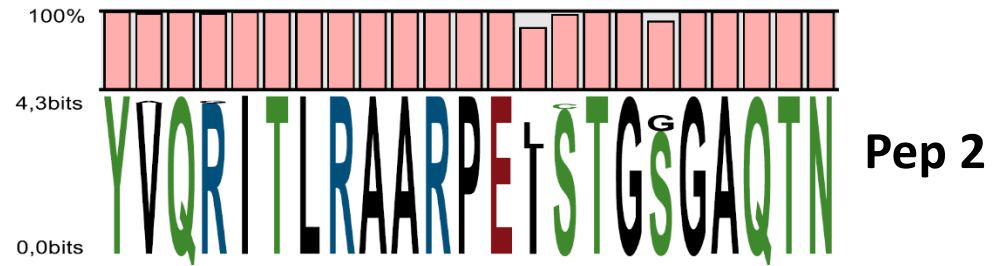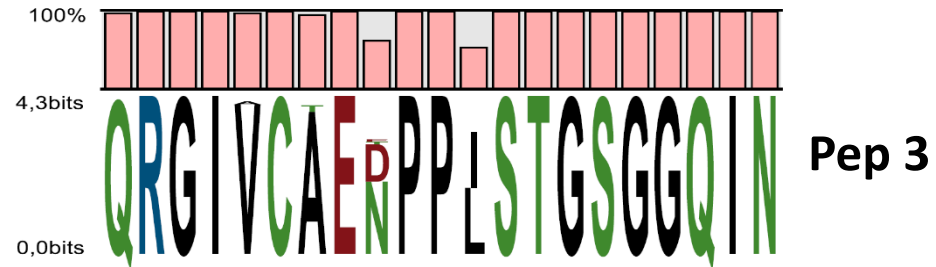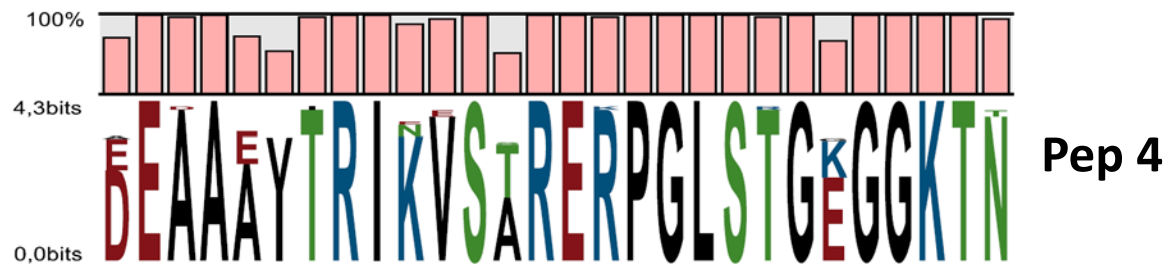

Supplement: 12863_2017_593_MOESM3_ESM.pdf [file 12863_2017_593_MOESM3_ESM.pdf]
